# Supplementary material
Source: Royal Society of Chemistry journal article supplement (doi:10.1039/d5qi02574e)
Supplement: d5qi02574e1.pdf [file d5qi02574e1.pdf]

1

## Supplementary Material

### 2 **Regulating reaction intermediates adsorption via electronic structural engineering** 3 **of MoN/Co<sub>4</sub>N for efficient water splitting**

4 Yu Wang<sup>a</sup>, Yaxiao Cui<sup>a</sup>, Xueyi Zhao<sup>a</sup>, Xiaodan Xia<sup>a</sup>, Wenhui Li<sup>a</sup>, Zexing Wu<sup>a</sup>, Yanru Liu<sup>a\*</sup>,  
5 Volodymyr Turkevych<sup>b</sup>, Lei Wang<sup>a\*</sup>

6 <sup>a</sup> Key Laboratory of Eco-chemical Engineering, Ministry of Education, International Science and  
7 Technology Cooperation Base of Eco-chemical Engineering and Green Manufacturing, College of  
8 Chemistry and Molecular Engineering, Qingdao University of Science & Technology, 53 Zhengzhou  
9 Road, 266042, Qingdao, P. R. China

10 <sup>b</sup> V. Bakul Institute for Superhard Materials, National Academy of Sciences of Ukraine, Kyiv 04074,  
11 Ukraine

12 \* E-mail: liuyanru@qust.edu.cn (Yanru Liu), inorchemwl@126.com (Lei Wang).

## 13 1. Experimental section

### 14 1.1 Chemicals and materials

15  $\text{Co}(\text{NO}_3)_2 \cdot 6\text{H}_2\text{O}$  (98%) was purchased from the official website of Shanghai Adamas Reagent  
16 Co., Ltd. Dimethylimidazole (2-MI) and  $\text{C}_{10}\text{H}_{14}\text{MoO}_6$  were purchased from Maclean's Biochemical  
17 Technology Ltd (Shanghai, China). Ethanol and methanol purchased from Sinopharm Chemical  
18 Reagent Co. Commercially available platinum on activated carbon (20 wt% Pt/C) and Nafion (5 wt%)  
19 were purchased from Sigma-Aldrich. All chemicals were used as received without further purification.

### 20 1.2 Materials synthesis

21 Synthesis of ZIF-67: Dissolve 0.292 g of  $\text{Co}(\text{NO}_3)_2 \cdot 6\text{H}_2\text{O}$  and 0.658 g of 2-MI in 20 ml of ethanol,  
22 stirring at room temperature for 30 min. Afterward, pour  $\text{Co}^{2+}$  into a 2-MI solution and stir at room  
23 temperature for 1 hour. Afterward, centrifugation was performed, washed 3 times with anhydrous  
24 ethanol, and finally dried for 12 hours in a vacuum drying oven at 60 °C.

25 Synthesis of  $\text{MoCo}@\text{HZIF}$ : 100 mg of ZIF-67 was dispersed in 15 ml of N,N-dimethylformamide  
26 (DMF), followed by 50 mg of molybdenum acetylacetonate ( $\text{C}_{10}\text{H}_{14}\text{MoO}_6$ ) added to the solution and  
27 sonicated for 10 min. Transferred to a reactor and hydrothermally reacted at 150 °C for 6 hours. Cooled  
28 to room temperature, separated by centrifugation, washed three times with methanol and dried under  
29 vacuum at 60 °C to give  $\text{MoCo}@\text{HZIF}$ .

30 Synthesis of  $\text{MoN}/\text{Co}_4\text{N}@/\text{NC}$ : To prepare the  $\text{MoN}/\text{Co}_4\text{N}@/\text{NC}$  catalyst, the  $\text{MoCo}@\text{HZIF}$   
31 precursor was heated to 500 °C in a tube furnace at a rate of 5 °C/min, held under a flowing ammonia  
32 atmosphere for 2 hours, and then naturally cooled to room temperature to obtain the sample.

33 Synthesis of  $\text{Co}_4\text{N}@/\text{NC}$ ,  $\text{MoN}/\text{Co}_4\text{N}@/\text{NC}-0.25$ ,  $\text{MoN}/\text{Co}_4\text{N}@/\text{NC}-0.75$  and  $\text{MoN}/\text{Co}_4\text{N}@/\text{NC}-1$ :  
34 In the synthesis of precursors, the amount of Mo source added was adjusted to be 0 mg, 25 mg, 75 mg  
35 and 100 mg, respectively, and the other preparation procedures were the same as that of  
36  $\text{MoN}/\text{Co}_4\text{N}@/\text{NC}$ .

37 Synthesis of  $\text{MoN}@/\text{NC}$ : The synthetic method was similar to that of  $\text{MoN}/\text{Co}_4\text{N}@/\text{NC}$ , except  
38 that ZIF-67 was replaced with ZIF-8. The synthesis of ZIF-8 was performed according to a previously  
39 reported procedure[1].

### 40 1.3 Materials characterization

41 We detected the crystal structure and composition of the samples by testing X-ray diffraction  
42 (XRD) on X'Pert PRO MPD at a rate of 5 °C/min. The SEM and TEM investigations were conducted  
43 to observe the morphology of different samples on JEOL, JSM-7500F, and FEI, Tecnai-C20,  
44 respectively. In addition, the FEI, Tecnai-C20 was also used to further characterize the distribution  
45 and composition of samples by TEM-mapping and EDX testing. To characterize the surface chemical  
46 state of samples, we performed the X-ray photoelectron spectroscopy (XPS) on Thermo Scientific  
47 Escalab 250Xi.

#### 48 **1.4 Electrochemical measurement**

49 For the preparation of the working electrode, 5 mg of the catalyst was dispersed in 1 mL of  
50 water/isopropanol (1:3 volume ratio) solvent followed by adding 25  $\mu$ L of Nafion. After sonication for  
51 30 min to form a homogeneous ink, a 10  $\mu$ L drop was cast on a freshly polished RDGCE/GCE and  
52 dried under ambient conditions.

53 All electrochemical performance tests were conducted using an electrochemical workstation  
54 named Gamry Instruments Reference 3000. Typically, graphite rods, solid Ag/AgCl electrode, and  
55 glassy carbon electrode (GCE, 3 mm in diameter) were used as auxiliary, reference, and working  
56 electrodes in 1 M KOH, 0.5 M H<sub>2</sub>SO<sub>4</sub>, and 1 M PBS solution, respectively. Here, the potentials are  
57 given versus the reversible hydrogen electrode (RHE), transformed by the equation

$$58 \quad \text{In 1.0 M KOH, } E_{\text{RHE}} = E_{\text{SCE}} + 1.068 \text{ V.}$$

59 Tafel slopes were deduced by fitting the corresponding LSV curves of overpotential vs log (j)

$$60 \quad \eta = a + b \log j$$

61 Where  $\eta$  refers to the overpotential,  $b$  represents the Tafel slope, and  $j$  is the current density.  
62 Electrochemical impedance spectroscopy (EIS) was performed in a frequency window of 0.001 to  
63 100000 Hz with a 5.0 mV amplitude. For the HER, the applied potential for EIS measurements was  
64 set at -1.219 V, and 0.393 V for the OER. The electrochemical double-layer capacitance ( $C_{\text{dl}}$ ) was  
65 determined by the CVs performed in the non-Faraday process area.  $C_{\text{dl}}$  is the electric double-layer  
66 capacitance calculated from the non-Faradaic region and  $C_s$  is the specific capacitance of a flat, smooth  
67 electrode surface, whose value was numerically taken as 40  $\mu$ F cm<sup>-2</sup>.

$$68 \quad ECSA = \frac{C_{dl}}{C_s}$$

## 69 **1.5 DFT computation details**

70 We performed the first-principles calculations in the frame of density functional theory (DFT)  
71 with the Vienna ab initio simulation package (VASP)[2]. The exchange-correlation energy is described  
72 by the Perdew-Burke-Ernzerhof (PBE) form of generalized-gradient approximation (GGA) exchange-  
73 correlation energy functional [3,4]. The structure optimizations of MoN and Co<sub>4</sub>N have been carried  
74 out by allowing all atomic positions to vary and relaxing lattice parameters until the energy difference  
75 of successive atom configurations was less than  $10^{-6}$  eV. The force on each atom in the relaxed  
76 structures was less than 0.015 eV/Å. The cutoff energy for the plane-wave basis set was set to 400 eV.  
77 The k-point spacing was set to be smaller than  $0.03 \text{ \AA}^{-1}$  over Brillouin zone (BZ)[5].

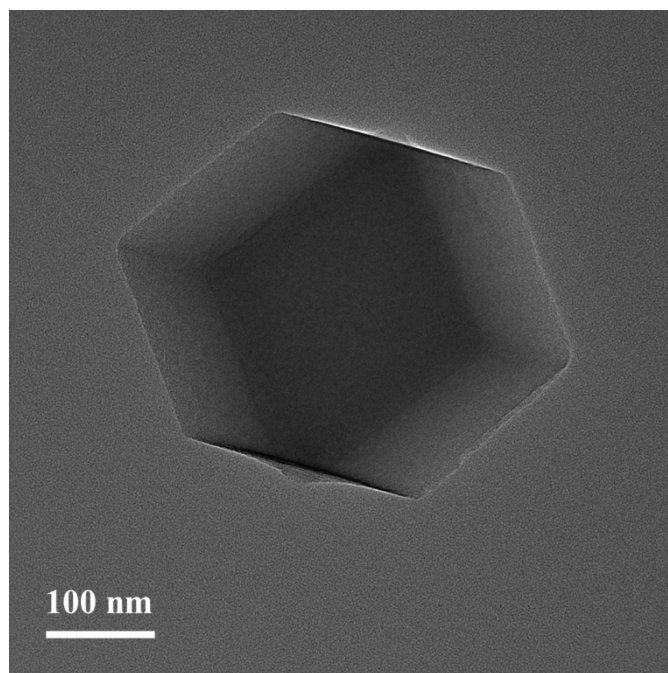

78

79

**Figure S1.** TEM image of ZIF-67.

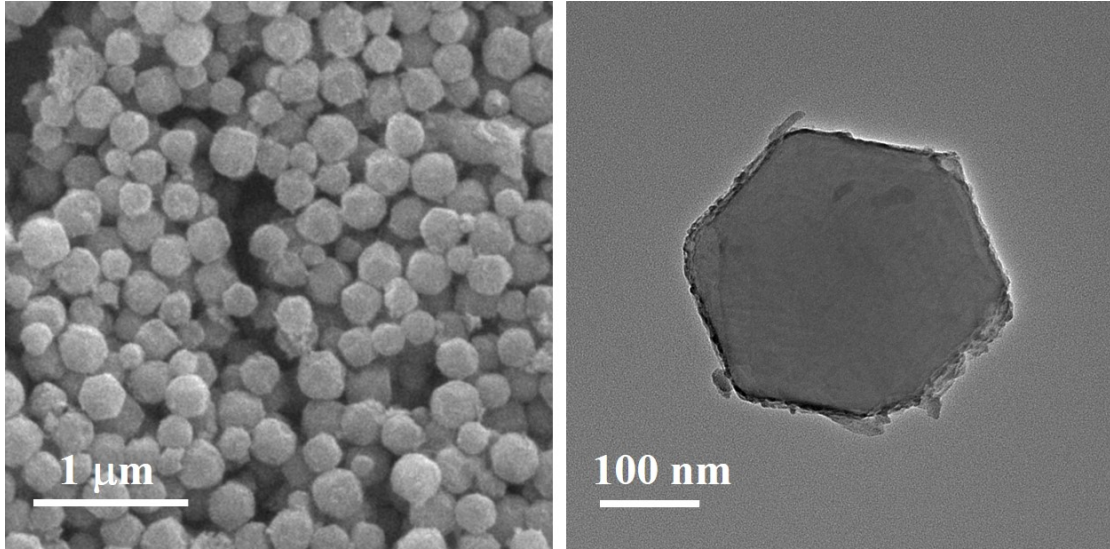

80

81

**Figure S2.** (a) SEM and (b) TEM images of MoCo@HZIF.

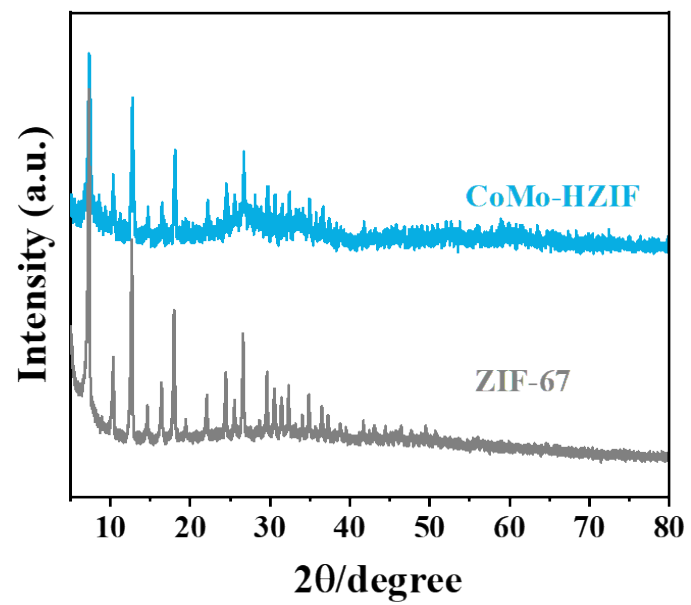

82

83 **Figure S3.** Simulation card of ZIF-67 and XRD pattern of CoMo-HZIF.

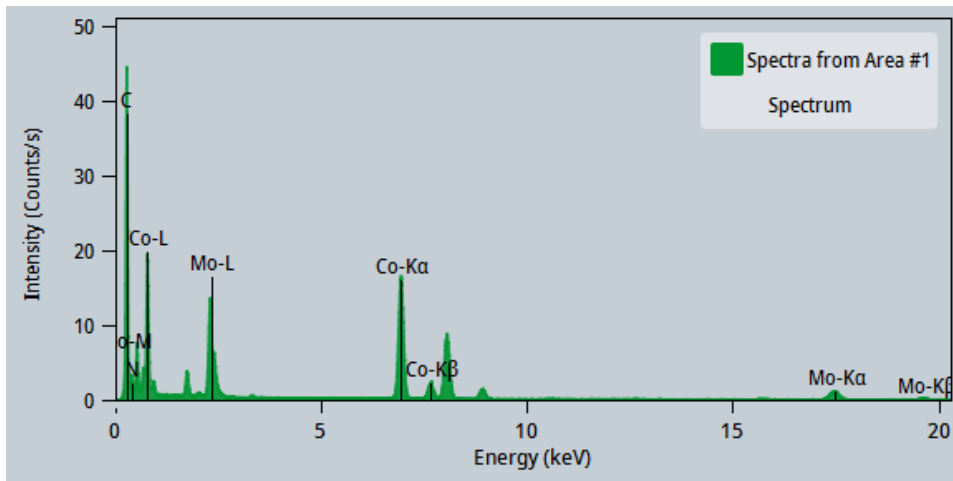

84

85

**Figure S4.** The EDS spectrum of MoN/Co<sub>4</sub>N@NC.

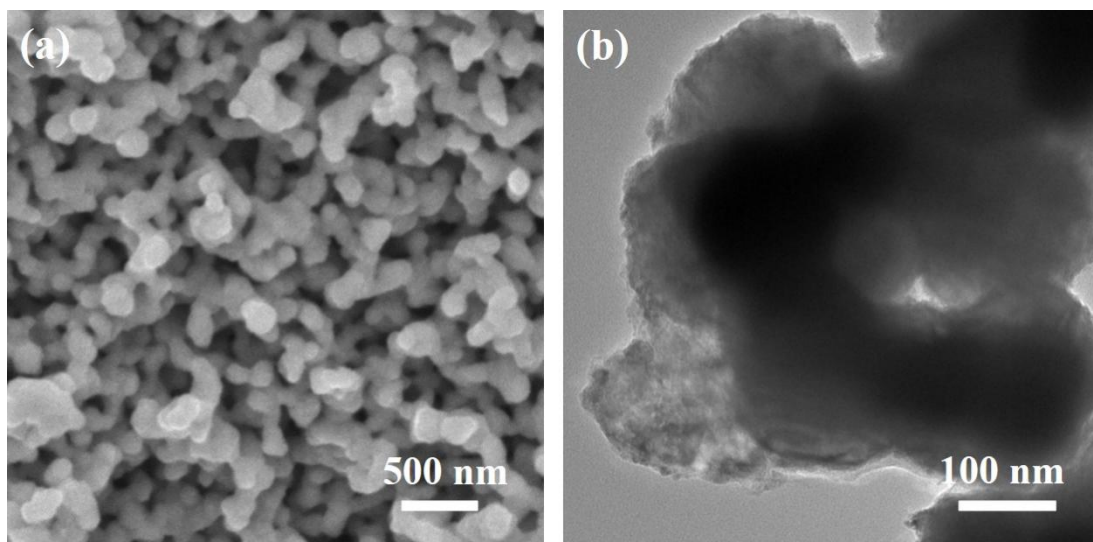

86

87

**Figure S5.** (a) SEM and (b) TEM images of  $\text{Co}_4\text{N}@\text{NC}$ .

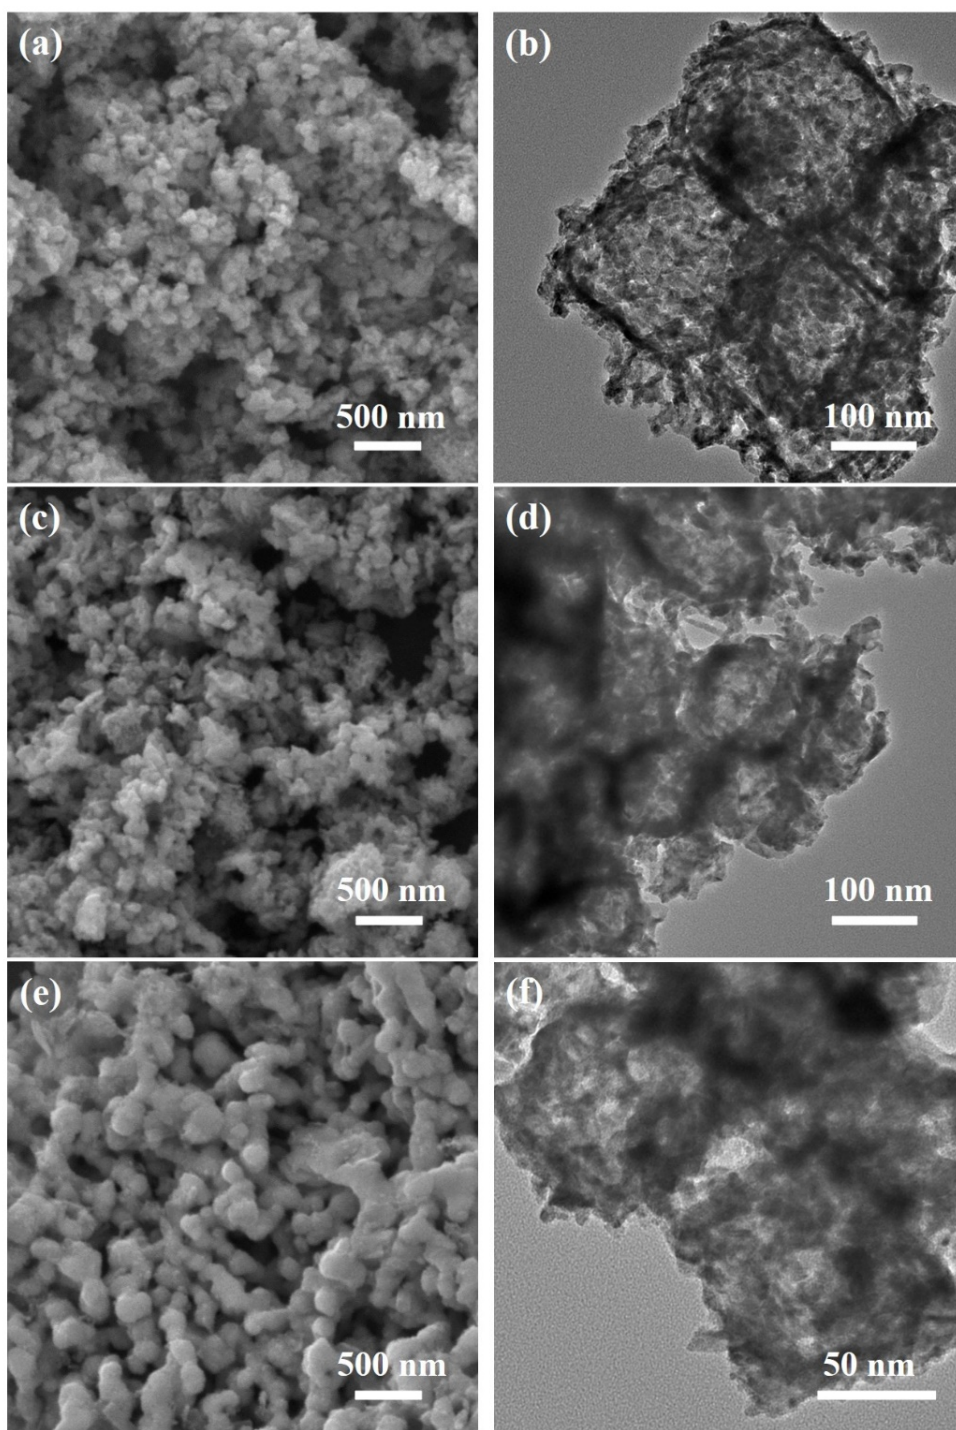

88

89

90

**Figure S6.** SEM images of samples MoN/Co<sub>4</sub>N@NC-0.25, MoN/Co<sub>4</sub>N@NC-0.75 and MoN/Co<sub>4</sub>N@NC-1 are (a), (b) and (c), respectively.

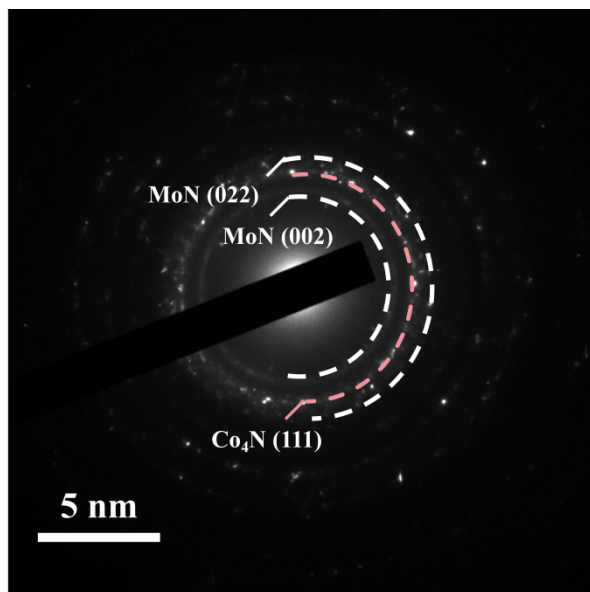

91

92

**Figure S7.** SAED patterns of MoN/Co<sub>4</sub>N@NC.

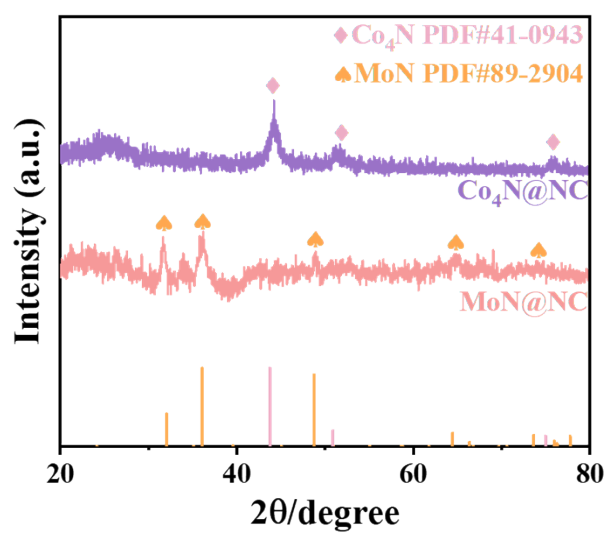

93

94 **Figure S8.** XRD patterns of (a) Co<sub>4</sub>N@NC and (b) MoN@NC.

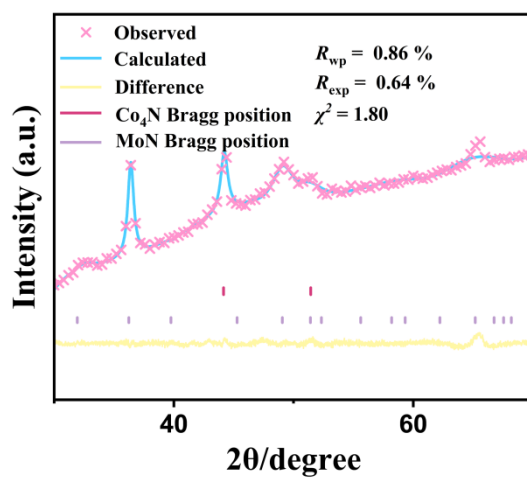

95

96

**Figure S9.** Rietveld refinement pattern of MoN/Co<sub>4</sub>N@NC.

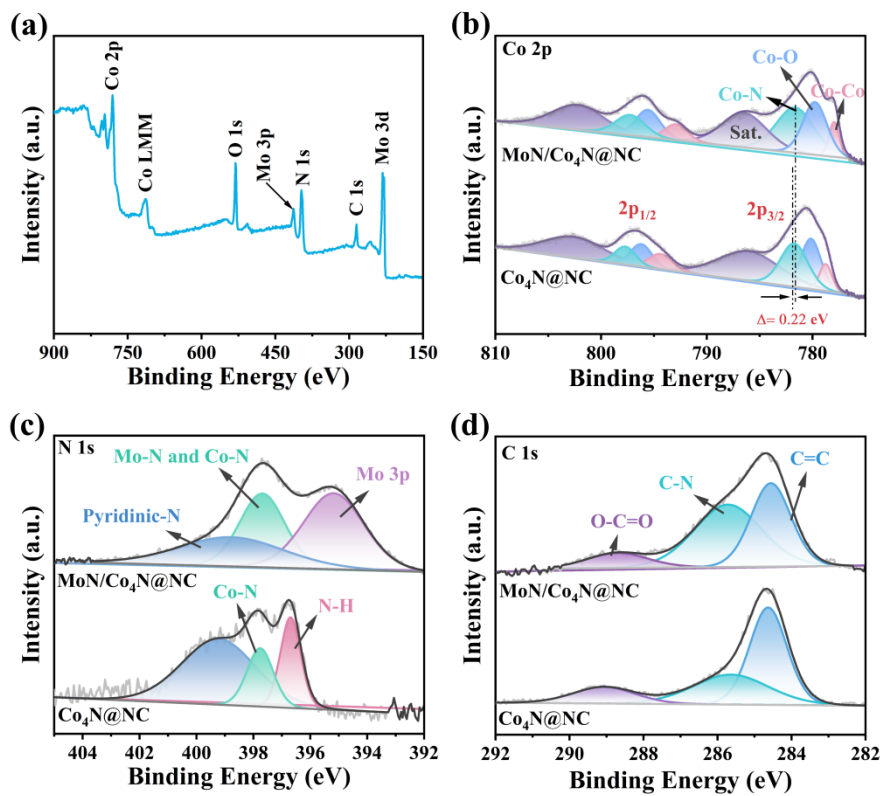

98

99 **Figure S10.** (a) XPS survey spectra of MoN/Co<sub>4</sub>N@NC. High-resolution XPS spectra of (b) Co 2p,

100 (c) N 1s and (d) C 1s for MoN/Co<sub>4</sub>N@NC and Co<sub>4</sub>N@NC.

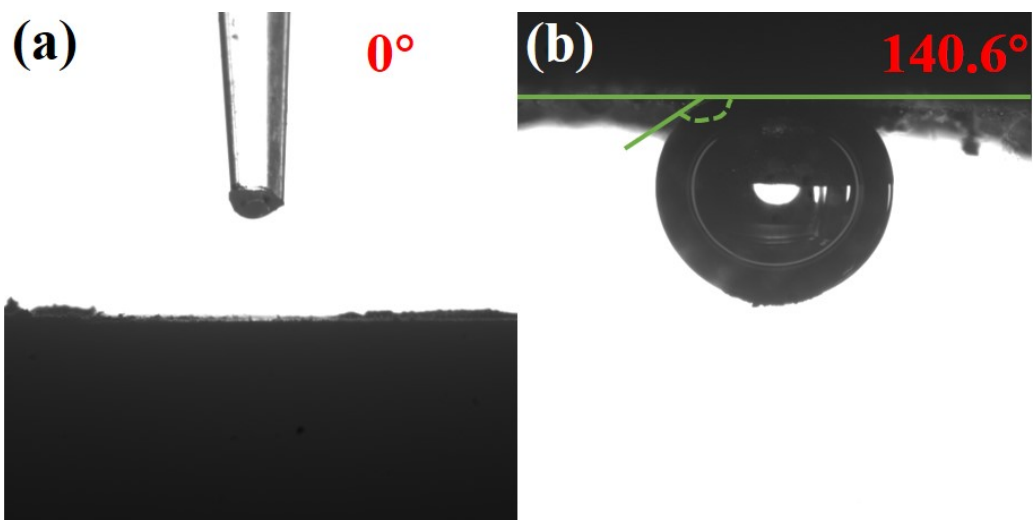

101

102 **Figure S11.** (a) and (b) are images of the water and bubble contact angles for MoN/Co<sub>4</sub>N@NC,

103

respectively.

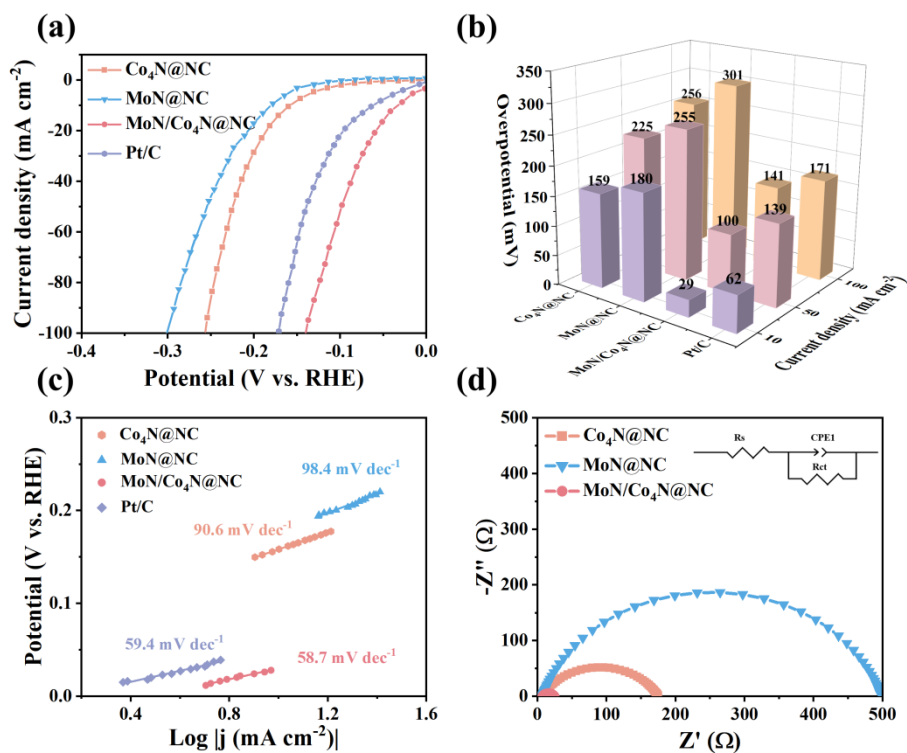

104

105 **Figure S12.** (a) LSV polarization curves and (b) overpotentials at 10, 50, and 100 mA cm<sup>-2</sup> of

106 Co<sub>4</sub>N@NC, MoN@NC, MoN/Co<sub>4</sub>N@NC and Pt/C. (c) Tafel plots for Co<sub>4</sub>N@NC, MoN@NC,

107 MoN/Co<sub>4</sub>N@NC and Pt/C. (d) Electrochemical impedance spectra of the Co<sub>4</sub>N@NC, MoN@NC

108

and MoN/Co<sub>4</sub>N@NC.

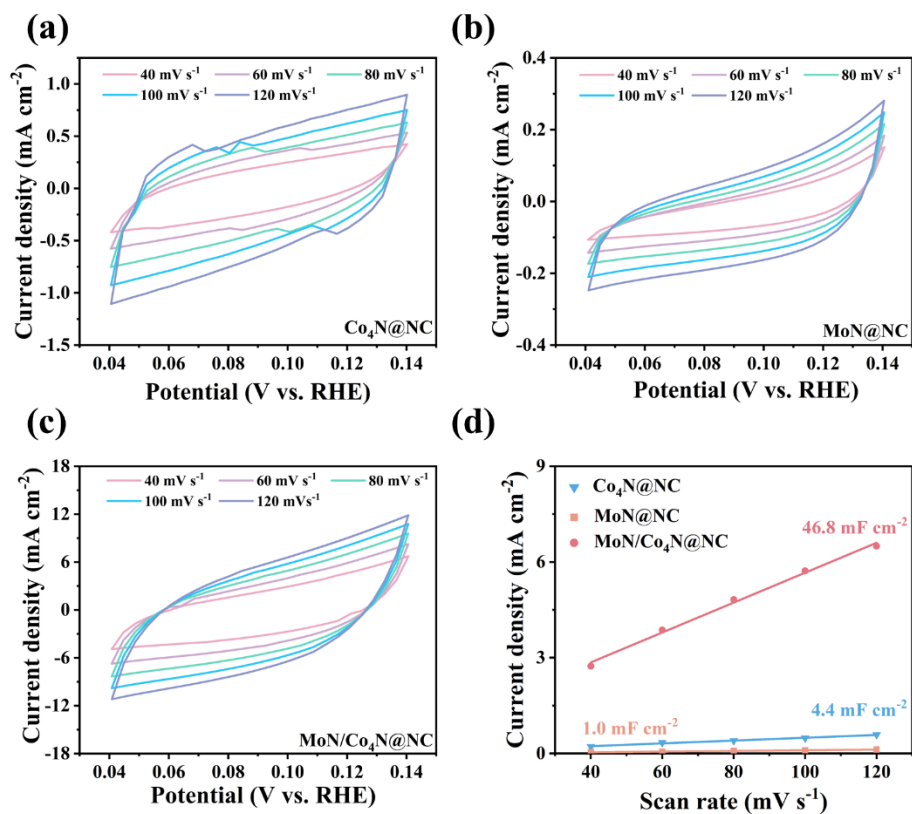

109

110 **Figure S13.** CV curves of (a) Co<sub>4</sub>N@NC, (b) MoN@NC and (c) MoN/Co<sub>4</sub>N@NC in the potential  
 111 range of 0.04~0.14 V vs. RHE at various CV scan rates (40~120 mV s<sup>-1</sup>) in 1.0 M KOH. (d) Double-  
 112 layer capacitance (C<sub>dl</sub>).

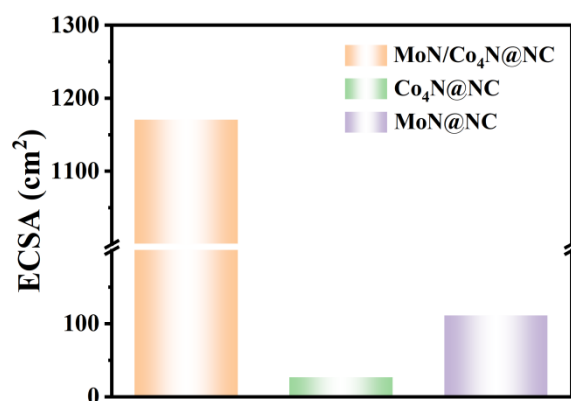

113

114 **Figure S14.** ECSA values of Co<sub>4</sub>N@NC, MoN@NC, MoN/Co<sub>4</sub>N@NC in 1 M KOH media for HER.

115

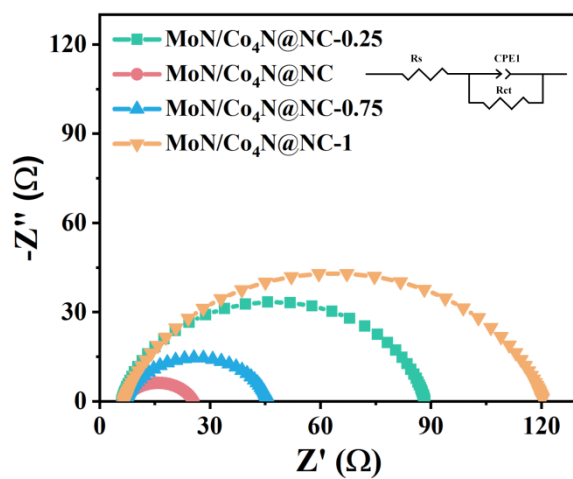

116

117 **Figure S15.** Electrochemical impedance spectra of the MoN/Co<sub>4</sub>N@NC-0.25, MoN/Co<sub>4</sub>N@NC,

118 MoN/Co<sub>4</sub>N@NC-0.75 and MoN/Co<sub>4</sub>N@NC-1.

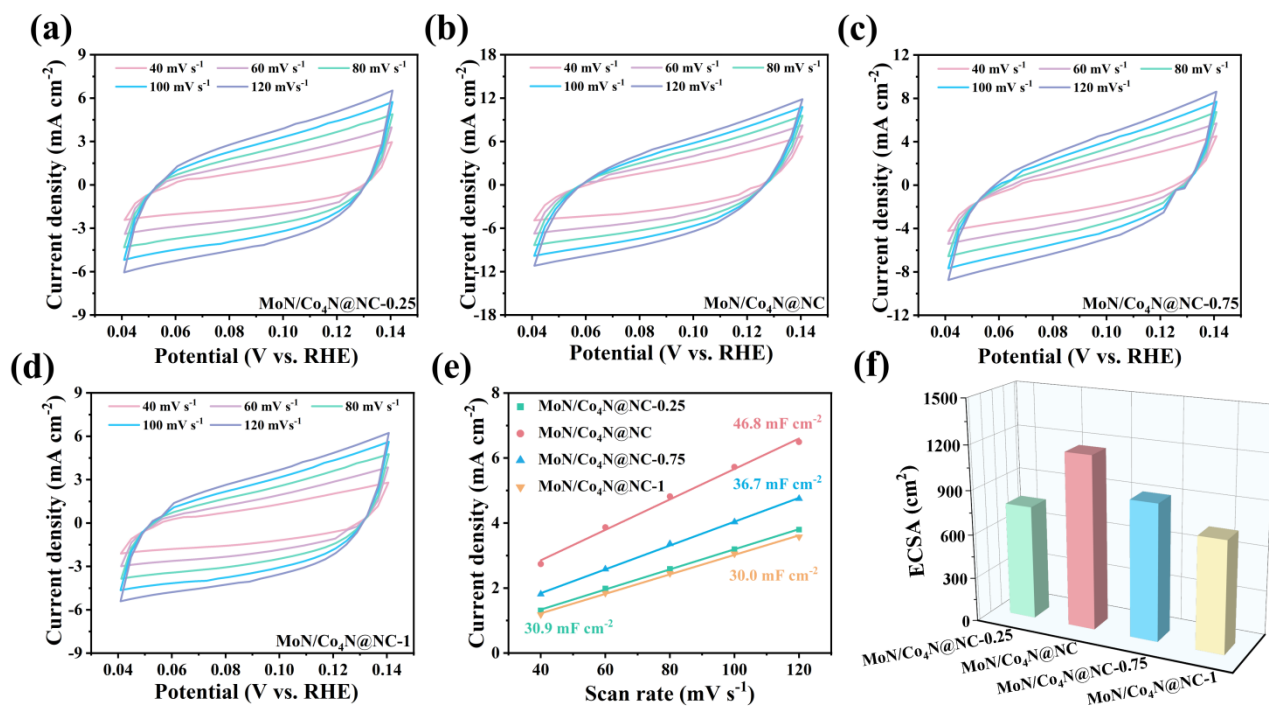

119

120 **Figure S16.** CV curves of (a) MoN/Co<sub>4</sub>N@NC-0.25, (b) MoN/Co<sub>4</sub>N@NC, (c) MoN/Co<sub>4</sub>N@NC-  
 121 0.75 and (d) MoN/Co<sub>4</sub>N@NC-1 in the potential range of 0.04~0.14 V vs. RHE at various CV scan  
 122 rates (40~120 mV s<sup>-1</sup>) in 1.0 M KOH. (e) C<sub>dl</sub> values. (f) ECSA values.

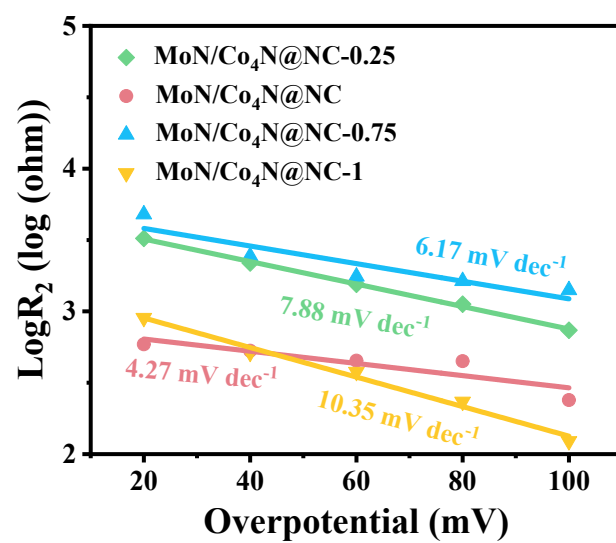

123

124

**Figure S17.** Tafel slopes from EIS of logR<sub>2</sub> for catalysts.

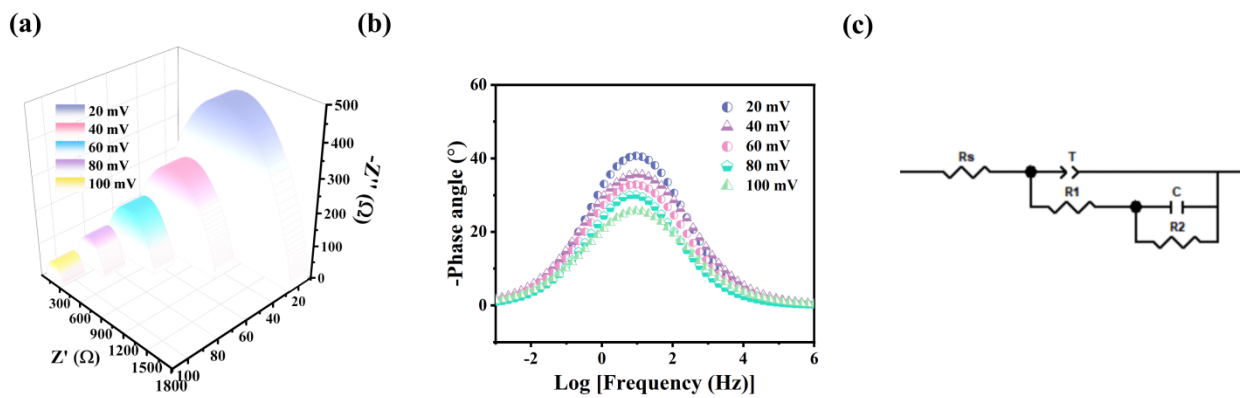

125

126 **Figure S18.** (a) In-situ EIS of MoN/Co<sub>4</sub>N@NC-0.25. (b) Bode plot of MoN/Co<sub>4</sub>N@NC-0.25. (c)

127

Equivalent circuit model of in-situ EIS.

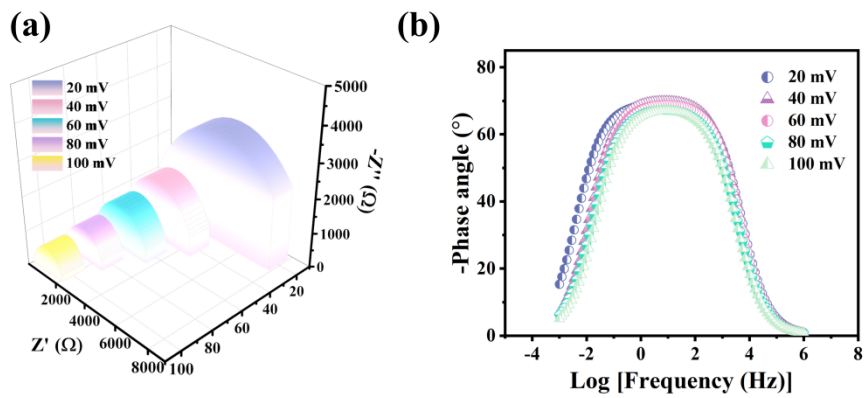

128

129

**Figure S19.** (a) In-situ EIS of MoN/Co<sub>4</sub>N@NC-0.75. (b) Bode plot of MoN/Co<sub>4</sub>N@NC-0.75.

130

131

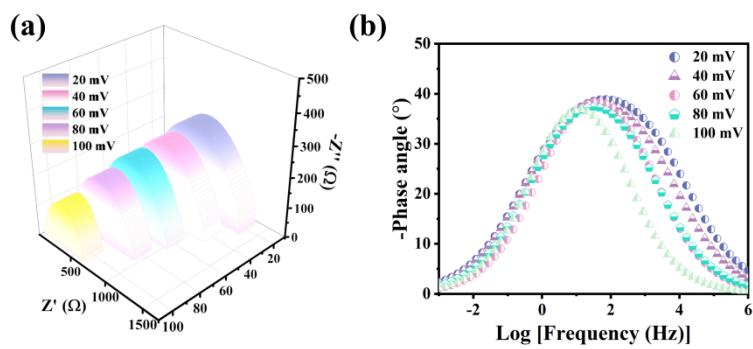

**Figure S20.** (a) In-situ EIS of MoN/Co<sub>4</sub>N@NC-1. (b) Bode plot of MoN/Co<sub>4</sub>N@NC-1.

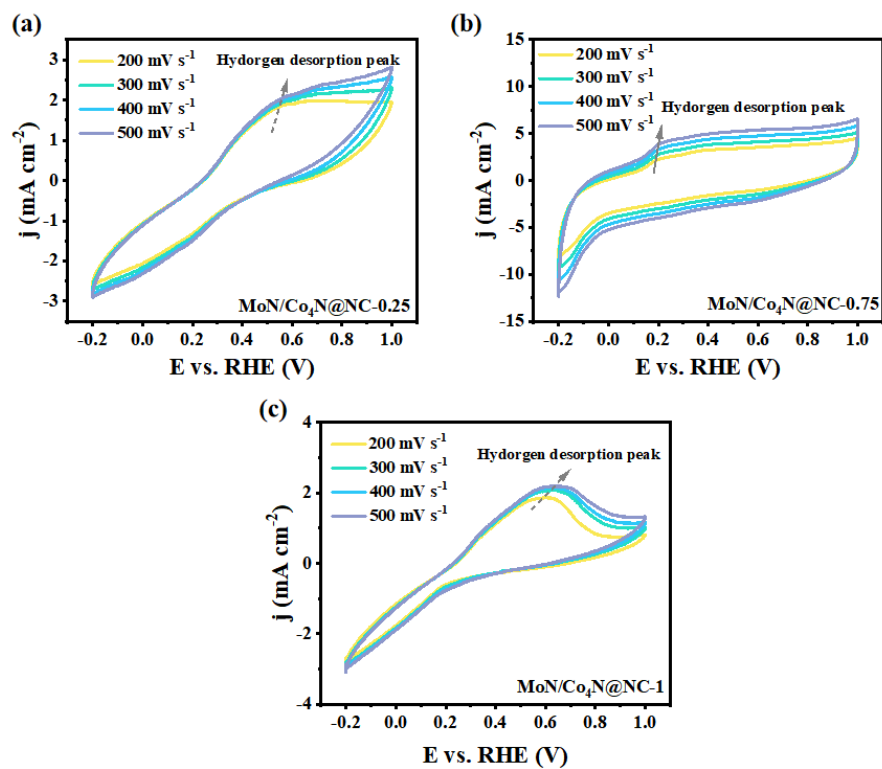

132

133

**Figure S21.** CV curves recorded at various scan rates under Ar.

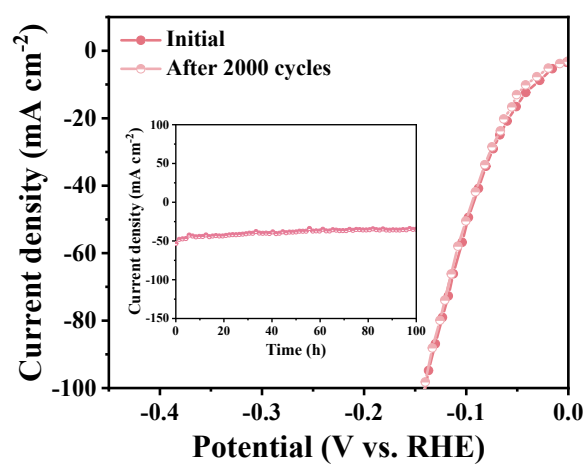

134

135 **Figure S22.** Electrochemical stability of the MoN/Co<sub>4</sub>N@NC electrode.

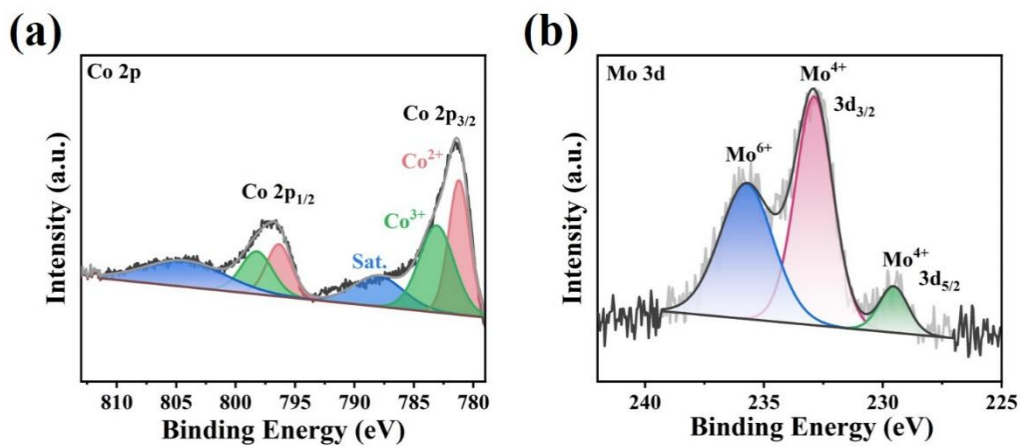

136  
 137 **Figure S23.** High-resolution XPS spectra for (a) Co 2p and (b) Mo 3d after stability test in 1 M  
 138 KOH solution.

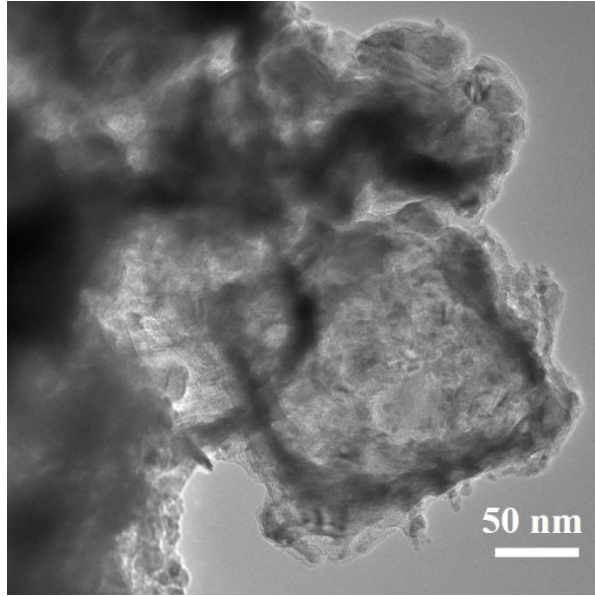

139

140 **Figure S24.** TEM image of MoN/Co<sub>4</sub>N@NC after stability test in 1 M KOH solution.

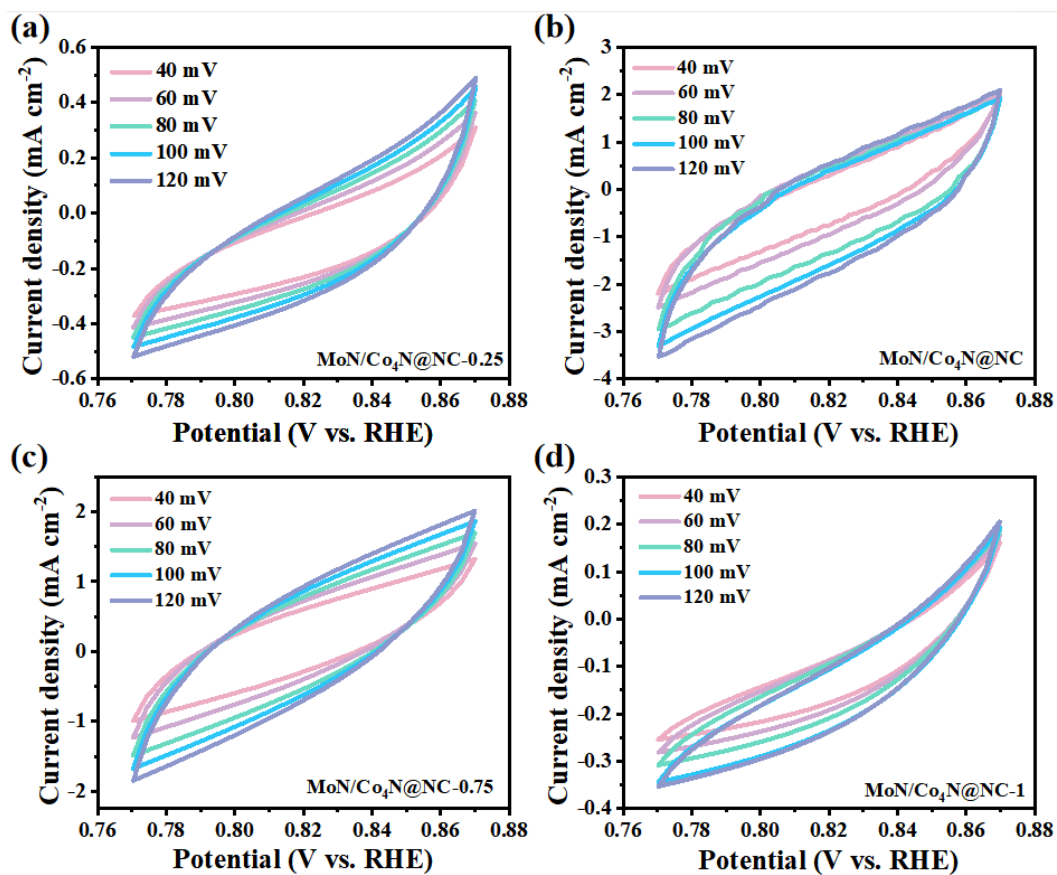

141

142 **Figure S25.** CV curves of (a) MoN/Co<sub>4</sub>N@NC-0.25, (b) MoN/Co<sub>4</sub>N@NC, (c) MoN/Co<sub>4</sub>N@NC-  
 143 0.75 and (d) MoN/Co<sub>4</sub>N@NC-1 in the potential range of 0.77~0.87 V vs. RHE at various CV scan  
 144 rates (40~120 mV s<sup>-1</sup>) in 1.0 M KOH for OER.

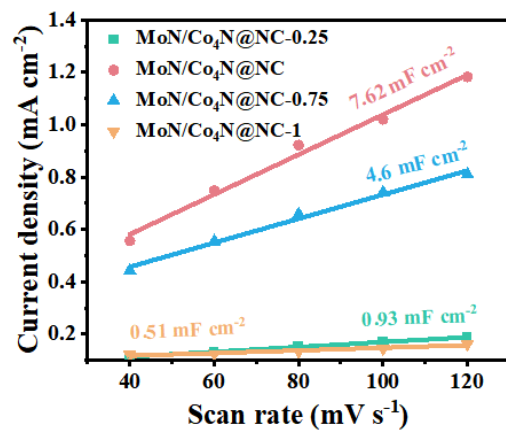

145

146 **Figure S26.**  $C_{dl}$  values of MoN/Co<sub>4</sub>N@NC-0.25, MoN/Co<sub>4</sub>N@NC, MoN/Co<sub>4</sub>N@NC-0.75 and

147

MoN/Co<sub>4</sub>N@NC-1 in 1.0 M KOH for OER.

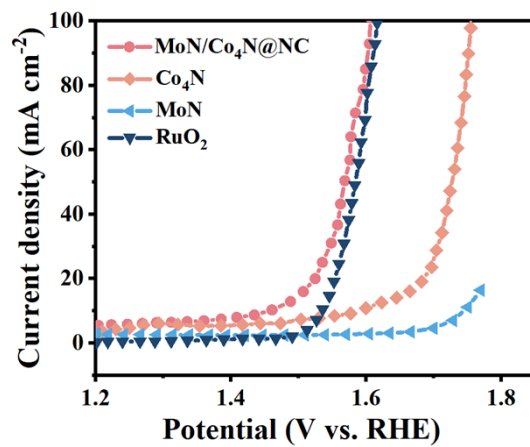

148  
 149 **Figure S27.** LSV curves of MoN@NC, Co<sub>4</sub>N@NC, MoN/Co<sub>4</sub>N@NC and RuO<sub>2</sub> in 1.0 M KOH for  
 150 OER.

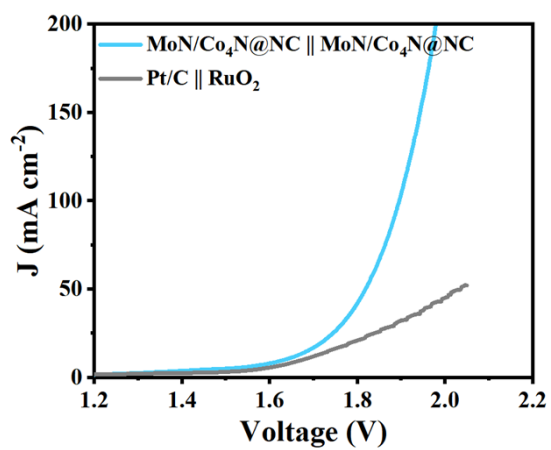

151

152 **Figure S28.** LSV curves of MoN/Co<sub>4</sub>N@NC in overall water splitting progress.

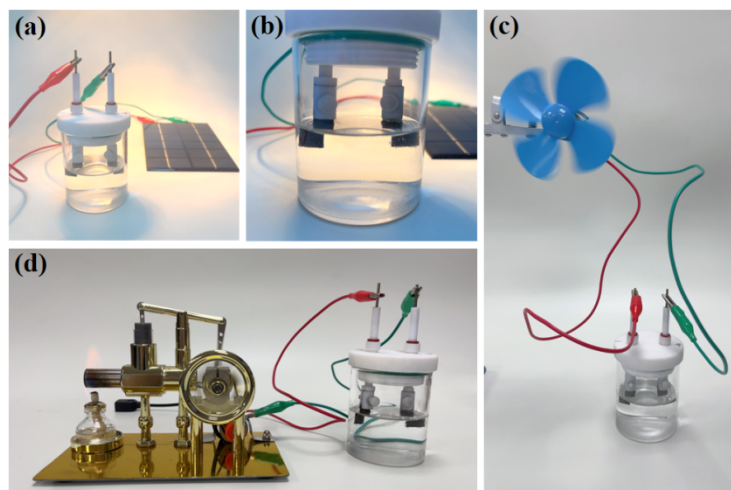

153

154 **Figure S29.** The MoN/Co<sub>4</sub>N@NC || MoN/Co<sub>4</sub>N@NC electrolyzer of overall water splitting driven by

155 (a,b) solar energy, (c) wind energy and (d) thermal energy.

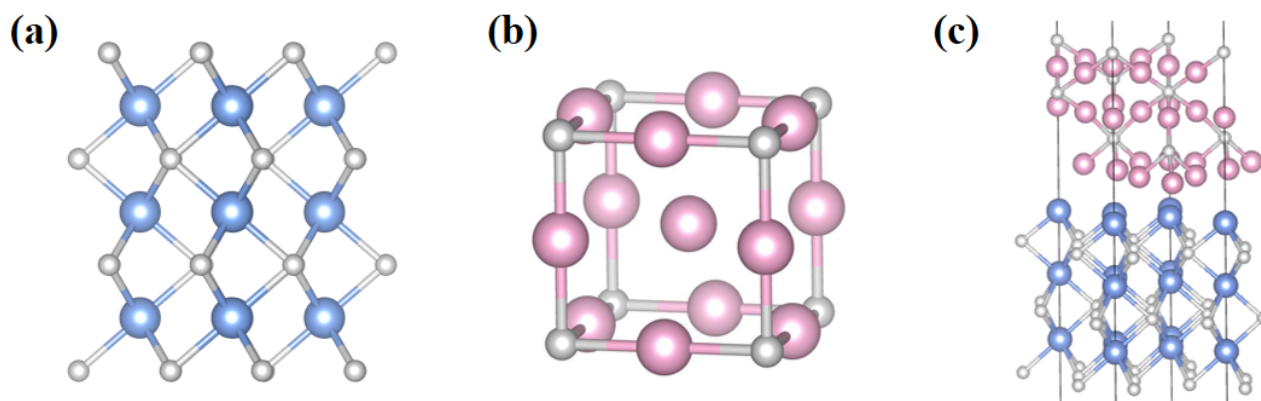

156

157

158 **Figure S30.** Modeled diagrams of (a) the MoN (111) plane, (b) the Co<sub>4</sub>N (111) plane and (c) the

159

MoN (111) / Co<sub>4</sub>N (111).

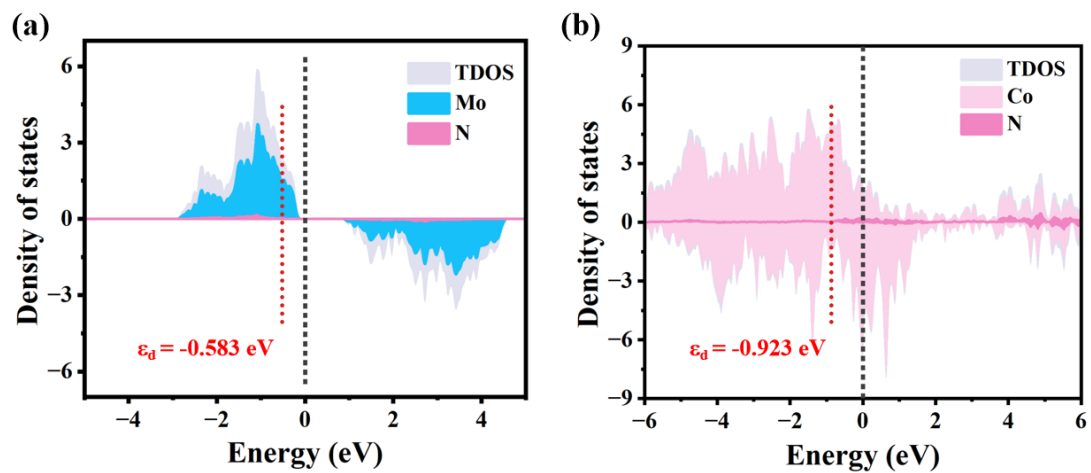

160

161

**Figure S31.** DOS spectra and corresponding d-band centers.

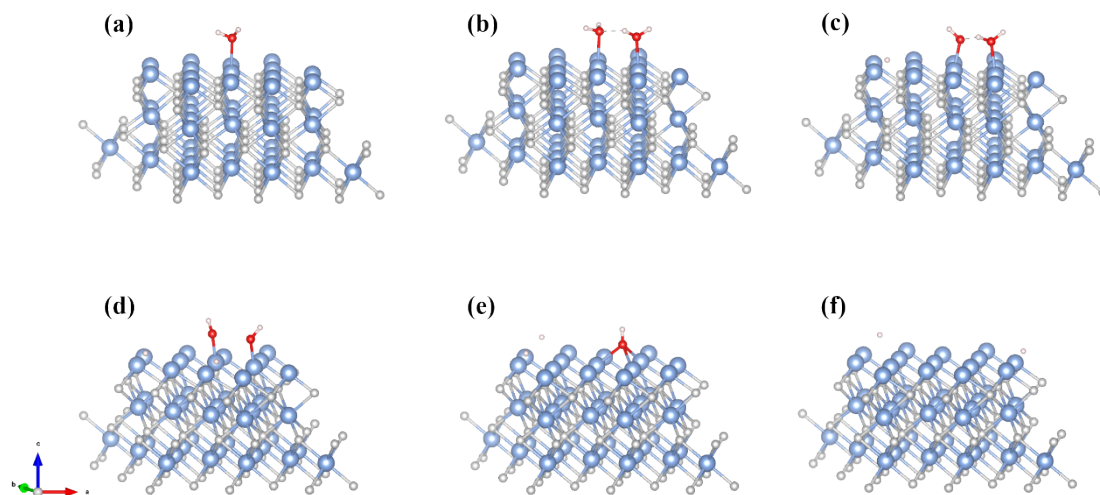

162

163 **Fig. S32.** The most stable geometric configuration of adsorption structure on MoN surface (a)  $^*\text{H}_2\text{O}$ ;

164 (b)  $2^*\text{H}_2\text{O}$ ; (c)  $^*\text{H}+^*\text{OH}+^*\text{H}_2\text{O}$ ; (d)  $2^*\text{H}+2^*\text{OH}$ ; (e)  $2^*\text{H}+^*\text{OH}$ ; (f)  $2^*\text{H}$ .

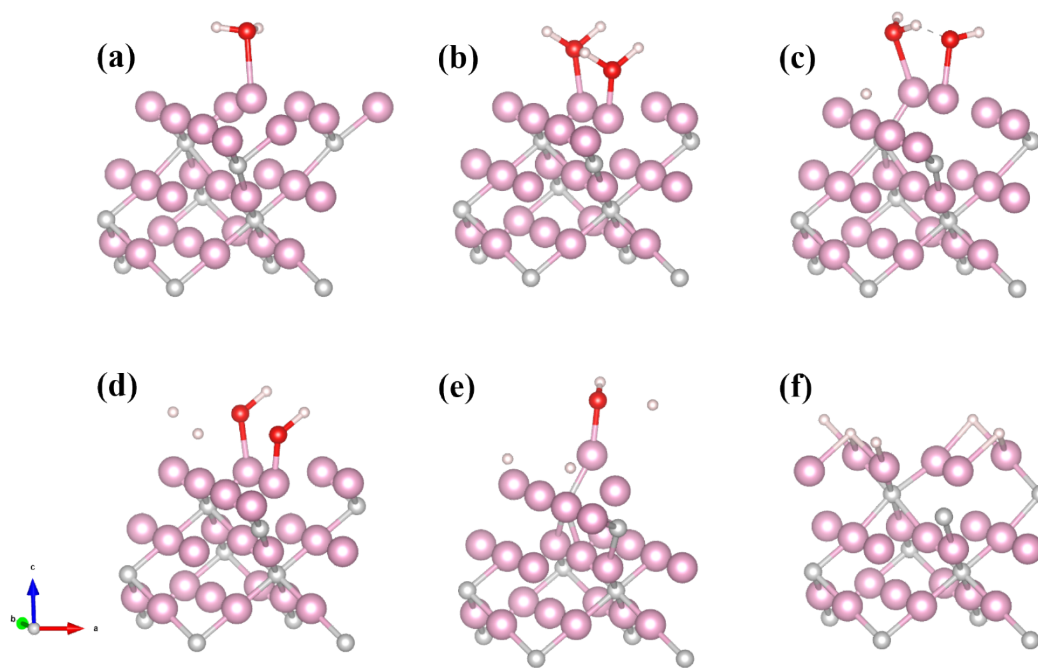

165

166 **Fig. S33.** The most stable geometric configuration of adsorption structure on Co<sub>4</sub>N surface (a) \*H<sub>2</sub>O;

167 (b) 2\*H<sub>2</sub>O; (c) \*H+\*OH+\*H<sub>2</sub>O; (d) 2\*H+2\*OH; (e) 2\*H+\*OH; (f) 2\*H.

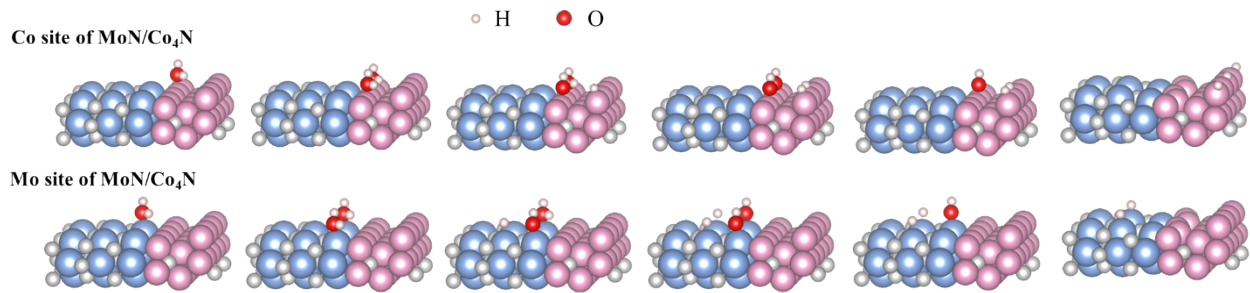

168

169 **Fig. S34.** Schematic diagrams illustrate each step of the alkaline hydrogen reaction process for the

170 Co site of MoN/Co<sub>4</sub>N and the Mo site of MoN/Co<sub>4</sub>N, respectively.

171 **Table S1.** Relative content of elements in prepared samples.

| <b>Catalyst</b>                    | <b>C (%)</b> | <b>N (%)</b> | <b>O (%)</b> | <b>Co (%)</b> | <b>Mo (%)</b> | <b>Co/Mo</b> |
|------------------------------------|--------------|--------------|--------------|---------------|---------------|--------------|
| <b>Co<sub>4</sub>N@NC</b>          | 39.63        | 5.03         | 42.24        | 13.11         | 0             | /            |
| <b>MoN/Co<sub>4</sub>N@NC-0.25</b> | 33.01        | 20.63        | 32.28        | 7.18          | 6.91          | 1.04         |
| <b>MoN/Co<sub>4</sub>N@NC</b>      | 19.29        | 39.45        | 20.51        | 7.11          | 13.65         | 0.52         |
| <b>MoN/Co<sub>4</sub>N@NC-0.75</b> | 19.69        | 41.42        | 19.96        | 5.65          | 13.28         | 0.425        |
| <b>MoN/Co<sub>4</sub>N@NC-1</b>    | 17.28        | 42.46        | 20.69        | 4.75          | 14.81         | 0.32         |

172

173 **Table S2.** Values of Tafel,  $R_{ct}$  and overpotential at  $10 \text{ mA cm}^{-2}$  for prepared samples in HER.

| <b>Catalyst</b>                    | <b><math>\eta</math> (mV) @ <math>10 \text{ mA cm}^{-2}</math></b> | <b>Tafel <math>\text{mV dec}^{-1}</math></b> | <b><math>R_{ct}</math> (<math>\Omega</math>)</b> |
|------------------------------------|--------------------------------------------------------------------|----------------------------------------------|--------------------------------------------------|
| <b>MoN/Co<sub>4</sub>N@NC</b>      | 29                                                                 | 55.8                                         | 19.1                                             |
| <b>MoN@NC</b>                      | 180                                                                | 93.4                                         | 490.5                                            |
| <b>Co<sub>4</sub>N@NC</b>          | 159                                                                | 83                                           | 168.6                                            |
| <b>MoN/Co<sub>4</sub>N@NC-0.25</b> | 75                                                                 | 89                                           | 82.4                                             |
| <b>MoN/Co<sub>4</sub>N@NC-0.75</b> | 55                                                                 | 73.7                                         | 56.9                                             |
| <b>MoN/Co<sub>4</sub>N@NC-1</b>    | 85                                                                 | 107.9                                        | 113.9                                            |

174

175 **Table S3.** Comparison of overall water splitting activity of MoN/Co<sub>4</sub>N@NC with other transition  
 176 metal-based electrocatalysts.

| <i>Electrocatalyst</i>            | <i>Electrolyte</i> | <i>J / mA cm<sup>-2</sup></i> | <i>Cell voltage</i> | <i>References</i>                                                           |
|-----------------------------------|--------------------|-------------------------------|---------------------|-----------------------------------------------------------------------------|
| <i>MoN/Co<sub>4</sub>N@NC</i>     | 1.0 M KOH          | 10                            | 1.63V               | This work                                                                   |
| <i>NiCo<sub>2</sub>N/NF</i>       | 1.0 M KOH          | 10                            | 1.70V               | <i>ChemSusChem</i> , 2017,<br>10, 4170.                                     |
| <i>Mo-NiCoP/NiCoN FS</i>          | 1.0 M KOH          | 10                            | 1.68V               | <i>FlatChem</i> , 2023, 42,<br>100552                                       |
| <i>Co/VN/NC-8</i>                 | 1.0 M KOH          | 10                            | 1.74V               | <i>ACS Appl. Nano Mater.</i> ,<br>2025, 8, 14, 7026-7038.                   |
| <i>Fe<sub>3</sub>N@CN-700</i>     | 1.0 M KOH          | 10                            | 1.64V               | <i>Sustain Energ Fuels</i> ,<br>2024, 8, 3452-3464.                         |
| <i>Co<sub>4</sub>N@Fe/N-C-18h</i> | 1.0 M KOH          | 10                            | 1.758V              | <i>Carbon Energ.</i> , 2024, 6,<br>e505.                                    |
| <i>V-CoN/CoN-I-400</i>            | 1.0 M KOH          | 10                            | 1.69V               | <i>J. Solid State Chem.</i> ,<br>2024, 335, 124701.                         |
| <i>Ni/MoN@NCNT/CC</i>             | 1.0 M KOH          | 10                            | 1.699V              | <i>ChemElectroChem</i> ,<br>2020, 7, 745.                                   |
| <i>CoO/Co<sub>4</sub>N/NF</i>     | 1.0 M KOH          | 10                            | 1.79V               | <i>J. Mater. Chem. A</i> ,<br>2018,6, 24767-24772.                          |
| <i>Fe-CoP nanoFC</i>              | 1.0 M KOH          | 10                            | 1.671V              | <i>Int. J. Hydrogen Energy</i> ,<br>2024, 90, 1401-1410.                    |
| <i>Ce<sub>1</sub>-CoP</i>         | 1.0 M KOH          | 10                            | 1.65V               | <i>ACS Sustainable Chem.</i><br><i>Eng.</i> , 2020, 8, 27, 10009-<br>10016. |
| <i>CoP@a-CoO<sub>x</sub></i>      | 1.0 M KOH          | 10                            | 1.66V               | <i>Adv. Sci.</i> , 2018, 5,<br>1800514.                                     |

177

## 178 **References**

179 [1] M. Huang, S. Zhou, D.-D. Ma, W. Wei, Q.-L. Zhu, Z. Huang, *Chem. Eng. J.* 2023, 473, 145170.

180 [2] J. P. Perdew, K. Burke, M. Ernzerhof, *Phys. Rev. Lett.* 1996, 77, 3865.

181 [3] G. Kresse, D. Joubert, *Phys. Rev. B* 1999, 59, 1758.

182 [4] J. P. Perdew, K. Burke, M. Ernzerhof, Generalized Gradient Approximation Made Simple, *Phy.*  
 183 *Rev. Lett.* 77 (1996) 3865.

184 [5] H. J. Monkhorst, J. D. Pack, *Phys. Rev. B* 1976, 13, 5188.

185
